# Supplementary material
Source: publisher figshare collection journal article supplement (https://acs.figshare.com/ndownloader/files/4556176)
Supplement: Supplementary file 1 [file 4556176]

## Supporting information:

### **Role of Redox Reaction and Electrostatics in Transition Metal Impurity-Promoted Photoluminescence Evolution of Water-Soluble ZnSe Nanocrystals <sup>\*\*</sup>**

*Jishu Han, Hao Zhang<sup>\*</sup>, Yue Tang, Yi Liu, Xi Yao, Bai Yang*

*State Key Laboratory of Supramolecular Structure and Materials, Jilin University,*

*Changchun 130012, P. R. China*

*E-mail: hao\_zhang@jlu.edu.cn*

**Figure S1** Low-magnification TEM image of ZnSe:Cu NCs.

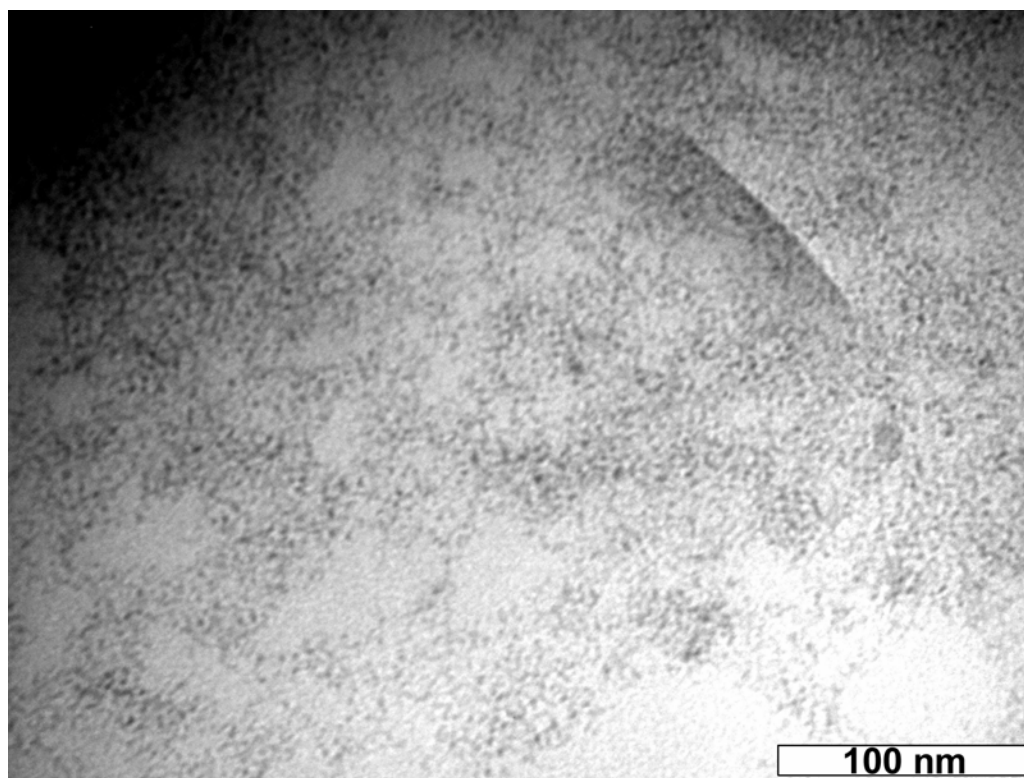

**Figure S2** The XPS Mn 2p spectrum of ZnSe:Mn NCs. The Mn/Zn feed ratio was 0.02/1. The appearance of the characteristic Mn 2p<sub>3/2</sub> peak at 641.4 eV and Mn 2p<sub>1/2</sub> peak at 656.1 eV indicated the presence of Mn element in the resulting NCs.

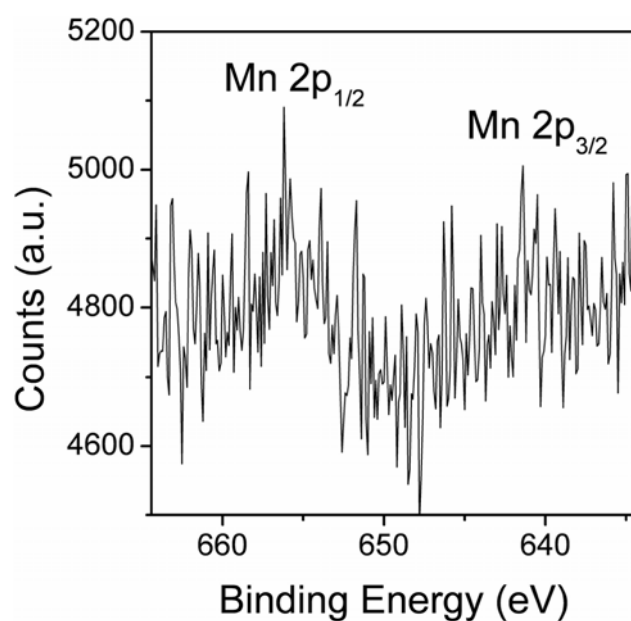

**Figure S3** The schematic illustration of the PL emission levels of doped ZnSe NCs.

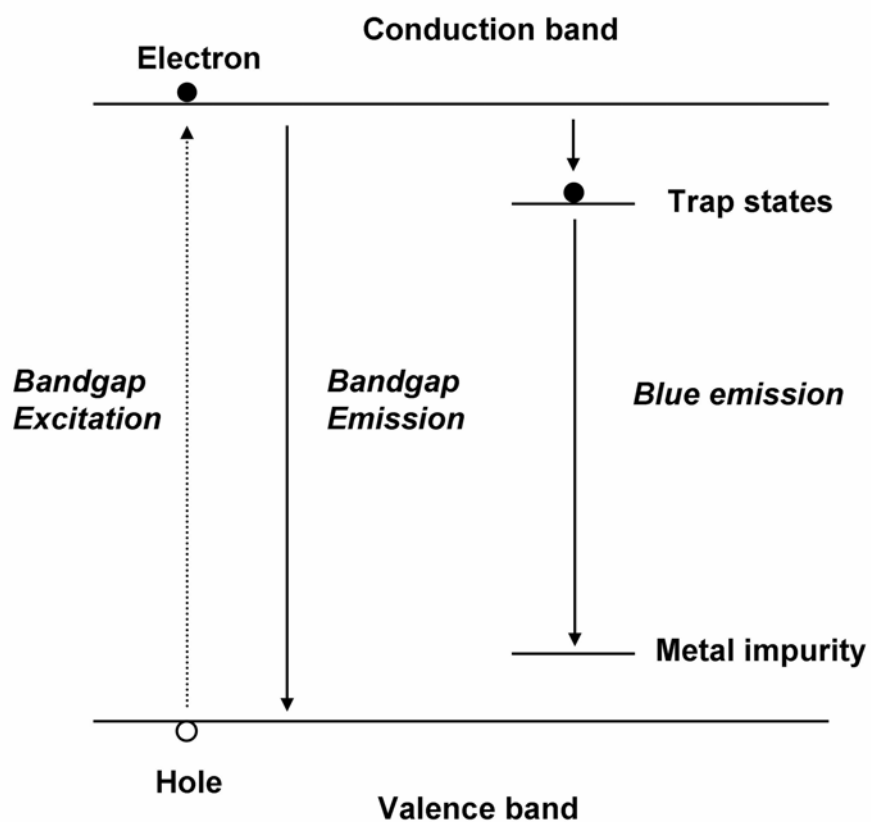

**Figure S4** The schematic illustration of the surface adsorption and internal doping of copper in ZnSe NCs.

**Growth-doping:**

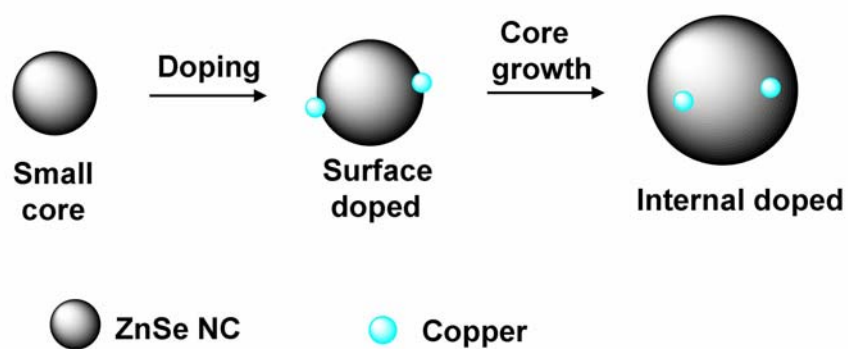

**Figure S5** The schematic mechanism of the aggregation of Cu-doped ZnSe NCs.

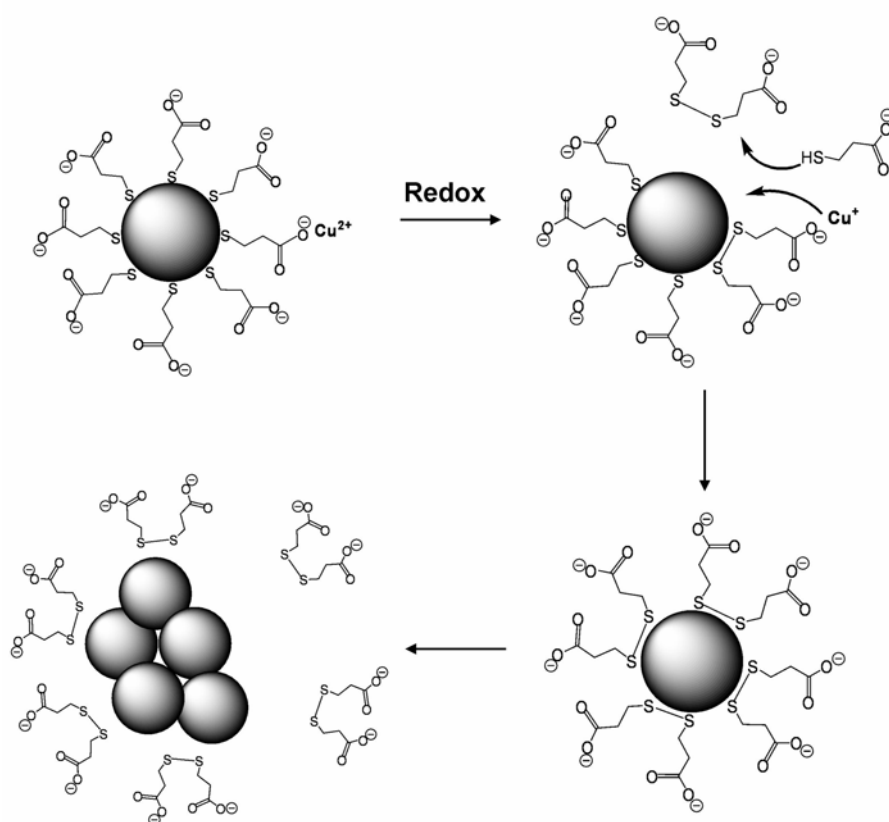

**Figure S6** The comparison of  $E_{Zn^{2+}/Zn}$  and  $E_{Cu^{2+}/Cu^+}$  in ZnSe:Cu-MPA system.

The computing method of the reduction potential of  $Zn^{2+}/Zn$  was expressed as

$$\begin{aligned}
 Zn^{2+} + 2e^- &= Zn & E_{Zn^{2+}/Zn}^0 &= -0.763 \text{ V} \\
 Zn(MPA) + 2e^- &= Zn + MPA^{2-} & E_{Zn(MPA)/Zn}^0 &= E_{Zn^{2+}/Zn}^0 - \frac{2.303RT}{nF} \lg K_{Zn(MPA)} \\
 Zn(MPA)_2^{2-} + 2e^- &= Zn + 2MPA^{2-} & E_{Zn(MPA)_2^{2-}/Zn}^0 &= E_{Zn^{2+}/Zn}^0 - \frac{2.303RT}{nF} \lg K_{Zn(MPA)_2^{2-}} \\
 Zn(MPA)_3^{4-} + 2e^- &= Zn + 3MPA^{2-} & E_{Zn(MPA)_3^{4-}/Zn}^0 &= E_{Zn^{2+}/Zn}^0 - \frac{2.303RT}{nF} \lg K_{Zn(MPA)_3^{4-}}
 \end{aligned}$$

where  $R$  was the gas constant,  $T$  was the temperature,  $n$  was the number of transferred electron,  $F$  was the Faraday constant, which was  $96500 \text{ C} \cdot \text{mol}^{-1}$ , and  $K$  was represented to the stability constant. In our system, the pH value was 11.5, whereas Cu/Zn had a specific molar ratio. Consequently,  $Zn^{2+}$  existed the side reaction with  $OH^-$ , and MPA would react with  $H^+$  and  $Cu^{2+}$ . In this context,  $\alpha_{Zn}$  was the side reaction coefficient of  $Zn^{2+}$ , which was expressed as  $\alpha_{Zn} = 1 + \sum_{i=1}^4 \beta_i [OH^-]^i$ ,  $\beta_i$  was the cumulative stability constant,  $\alpha_{MPA}$  was the side reaction coefficient of MPA, which was expressed as  $\alpha_{MPA} = \alpha_{MPA(H)} + \alpha_{MPA(Cu)} - 1 = (1 + \frac{1}{K_{MPA}}) + (1 + K_{Cu(MPA)_y^{x-}}) - 1$ ,  $K_{MPA}$  was the ionization constant, and  $K_{Cu(MPA)_y^{x-}}$  was the stability constant of  $Cu^{2+}$  and MPA.

So, take  $Zn(MPA)$  complex as the example, the reduction potential of  $Zn(MPA)/Zn$  was finally expressed as

$$E_{Zn(MPA)/Zn} = E_{Zn^{2+}/Zn}^0 - \frac{2.303RT}{nF} \lg K_{Zn} + \frac{2.303RT}{nF} \lg \alpha_{Zn} \alpha_{MPA} + \frac{2.303RT}{nF} \lg \frac{[Zn(MPA)]}{[MPA^{2-}]}$$

The calculated value of  $E_{Zn(MPA)/Zn}$  was approximately -0.840 V, which was slightly smaller than  $E_{Zn^{2+}/Zn}^0$  (-0.763 V). Similarly,  $E_{Zn(MPA)_2^{2-}/Zn}$  and  $E_{Zn(MPA)_3^{4-}/Zn}$  were also calculated. We could also calculate  $E_{Cu(MPA)/Cu^+}$  by using the aforementioned method. In

this context,  $\text{Cu}^{2+}$  would also react with  $\text{OH}^-$ , and MPA would react with  $\text{H}^+$  and  $\text{Zn}^{2+}$ . In

the end, the reduction potential of  $\text{Cu(MPA)/Cu}^+$  was expressed as

$$E_{\text{Cu(MPA)/Cu}^+} = E_{\text{Cu}^{2+}/\text{Cu}^+}^0 - \frac{2.303RT}{nF} \lg K_{\text{Cu}} + \frac{2.303RT}{nF} \lg \alpha_{\text{Cu}} \alpha_{\text{MPA}} + \frac{2.303RT}{nF} \lg \frac{[\text{Cu(MPA)}]}{[\text{MPA}^{2-}]}$$

The calculated  $E_{\text{Cu(MPA)/Cu}^+}$  was approximately 0.848 V, which was quite larger than

$E_{\text{Cu}^{2+}/\text{Cu}^+}^0$  (0.153 V). It meant in ZnSe:Cu-MPA system, the oxidability of Cu(II) was

improved. Cu(II) was easier to be reduced by MPA than Zn(II).
